# Supplementary material
Source: ML conference proceedings conference paper supplement (https://proceedings.mlr.press/v119/guo20i.html)
Supplement: Supplementary file 1 [file guo20i-supp.pdf]

## A. Proof of Convergence Results

We first introduce several useful function properties.

**Definition 1.** A function  $f(x) : \mathbb{R}^d \rightarrow \mathbb{R}$  is said to be Lipschitz-smooth with constant  $L$  if

$$\|\nabla f(x) - \nabla f(y)\| \leq L\|x - y\|, \forall x, y \in \mathbb{R}^d$$

**Definition 2.** A function  $f(x)$  has  $\rho$ -bounded gradients if  $\|\nabla f(x)\| \leq \rho, \forall x \in \mathbb{R}^d$ .

**Definition 3.** A function  $f(x)$  has  $\mathcal{B}$ -bounded Hessian if  $\|\nabla^2 f(x)\| \leq \mathcal{B}, \forall x \in \mathbb{R}^d$ .

Then, we prove the main results about convergence.

**Theorem 1. (Convergence.)** Suppose the supervised loss function is Lipschitz-smooth with constant  $L \leq 2$ , and the supervised loss and unsupervised loss have  $\rho$ -bounded gradients, then follow our optimization algorithm, the labeled loss always monotonically decreases with the iteration  $t$ , i.e.,

$$\mathcal{L}^{outer}(\theta_{t+1}) \leq \mathcal{L}^{outer}(\theta_t) \quad (1)$$

Furthermore, the equality in Eq.(1) holds only when the gradient of the outer objective respect to  $\alpha$  becomes 0 at some iteration  $t$ , i.e.,

$$\mathcal{L}^{outer}(\theta_{t+1}) = \mathcal{L}^{outer}(\theta_t)$$

if and only if

$$\nabla_{\alpha} \mathcal{L}^{outer}(\theta_t) = 0$$

*Proof.* The change of outer-level objective from iteration  $t$  to  $t + 1$  is:

$$\begin{aligned} & \mathcal{L}^{outer}(\theta_{t+1}) - \mathcal{L}^{outer}(\theta_t) \quad (2) \\ &= \mathcal{L}^{outer}(\theta_t - \eta_{\theta} \nabla_{\theta} \mathcal{L}^{inner}(\theta_t, \alpha_t)) - \mathcal{L}^{outer}(\theta_t) \\ &\leq \langle \nabla_{\theta} \mathcal{L}^{outer}(\theta_t), -\eta_{\theta} \nabla_{\theta} \mathcal{L}^{inner}(\theta_t, \alpha_t) \rangle + \\ &\quad \frac{L}{2} \| -\eta_{\theta} \nabla_{\theta} \mathcal{L}^{inner}(\theta_t, \alpha_t) \|^2 \\ &\leq \left(\frac{L}{2} - 1\right) \eta_{\theta} \rho^2 \leq 0. \end{aligned}$$

The first inequality holds since the loss function is Lipschitz-smooth with constant  $L$  and the second inequality holds since both the supervised and unsupervised loss function has  $\rho$ -bounded gradients. The third inequality holds since  $L \leq 2$ .

Moreover, it is obviously that if and only if  $\nabla_{\alpha} \mathcal{L}^{outer}(\theta_t) = 0$ , the optimization will converge and  $\mathcal{L}^{outer}(\theta_{t+1}) = \mathcal{L}^{outer}(\theta_t)$ .  $\square$

**Theorem 2. (Convergence Rate.)** Suppose the aforementioned conditions hold, let the step size  $\eta_{\theta}$  for  $\theta$  satisfies  $\eta_{\theta} = \min\{1, \frac{k}{T}\}$  for some constant  $k > 0$ , such that  $\frac{k}{T} < 1$  and  $\eta_{\alpha} = \min\{\frac{1}{L}, \frac{C}{\sqrt{T}}\}$  for some constant  $C > 0$ , such

that  $\frac{\sqrt{T}}{C} \leq L$ . Then, the approximation algorithm can achieve  $\mathbb{E}[\|\nabla_{\alpha} \mathcal{L}^{outer}(\theta_t)\|_2^2] \leq \epsilon$  in  $\mathcal{O}(1/\epsilon^2)$ . And more specifically,

$$\min_{0 \leq t \leq T} \mathbb{E}[\|\nabla_{\alpha} \mathcal{L}^{outer}(\theta_t)\|_2^2] \leq \mathcal{O}\left(\frac{C}{\sqrt{T}}\right)$$

where  $C$  is some constant independent to the convergence process.

*Proof.* First, according to the updating rule, we have:

$$\begin{aligned} & \mathcal{L}^{outer}(\theta_{t+1}) - \mathcal{L}^{outer}(\theta_t) \quad (3) \\ &= \mathcal{L}^{outer}(\theta_t - \eta_{\theta} \nabla_{\theta} \mathcal{L}^{inner}(\theta_t, \alpha_t)) \\ &\quad - \mathcal{L}^{outer}(\theta_{t-1} - \eta_{\theta} \nabla_{\theta} \mathcal{L}^{inner}(\theta_{t-1}, \alpha_{t-1})) \\ &= \{\mathcal{L}^{outer}(\theta_t - \eta_{\theta} \nabla_{\theta} \mathcal{L}^{inner}(\theta_t, \alpha_t)) \\ &\quad - \mathcal{L}^{outer}(\theta_{t-1} - \eta_{\theta} \nabla_{\theta} \mathcal{L}^{inner}(\theta_t, \alpha_t))\} \\ &\quad + \{\mathcal{L}^{outer}(\theta_{t-1} - \eta_{\theta} \nabla_{\theta} \mathcal{L}^{inner}(\theta_t, \alpha_t)) \\ &\quad - \mathcal{L}^{outer}(\theta_{t-1} - \eta_{\theta} \nabla_{\theta} \mathcal{L}^{inner}(\theta_{t-1}, \alpha_{t-1}))\} \end{aligned}$$

and

$$\begin{aligned} & \mathcal{L}^{outer}(\theta_t - \eta_{\theta} \nabla_{\theta} \mathcal{L}^{inner}(\theta_t, \alpha_t)) - \quad (4) \\ & \mathcal{L}^{outer}(\theta_{t-1} - \eta_{\theta} \nabla_{\theta} \mathcal{L}^{inner}(\theta_t, \alpha_t)) \\ & \leq \langle \nabla_{\theta} \mathcal{L}^{outer}[\theta_{t-1} - \eta_{\theta} \nabla_{\theta} \mathcal{L}^{inner}(\theta_t, \alpha_t)], \theta_t - \theta_{t-1} \rangle \\ & \quad + \frac{L}{2} \|\theta_t - \theta_{t-1}\|_2^2 \\ & \leq -\eta_{\theta} \rho^2 + \frac{L}{2} \eta_{\theta} \rho^2 = \eta_{\theta} \rho^2 \left(\frac{L}{2} - 1\right) \end{aligned}$$

For the second term, we can adopt a Lipschitz-continuous function as  $w$  to make  $\mathcal{L}^{outer}$  smooth w.r.t.  $\alpha$ . Then we have:

$$\begin{aligned} & \mathcal{L}^{outer}(\theta_{t-1} - \eta_{\theta} \nabla_{\theta} \mathcal{L}^{inner}(\theta_t, \alpha_t)) \quad (5) \\ & - \mathcal{L}^{outer}(\theta_{t-1} - \eta_{\theta} \nabla_{\theta} \mathcal{L}^{inner}(\theta_{t-1}, \alpha_{t-1})) \\ & \leq \langle \nabla_{\alpha} \mathcal{L}^{outer}(\theta_t), \alpha_t - \alpha_{t-1} \rangle + \frac{L}{2} \|\alpha_t - \alpha_{t-1}\|_2^2 \\ & = \langle \nabla_{\alpha} \mathcal{L}^{outer}(\theta_t), -\eta_{\alpha} \nabla_{\alpha} \mathcal{L}^{outer}(\theta_t) \rangle + \frac{L}{2} \eta_{\alpha}^2 \|\nabla_{\alpha} \mathcal{L}^{outer}(\theta_t)\|_2^2 \\ & = -(\eta_{\alpha} - \frac{L}{2} \eta_{\alpha}^2) \|\nabla_{\alpha} \mathcal{L}^{outer}(\theta_t)\|_2^2 \end{aligned}$$

Therefore,

$$\begin{aligned} & \mathcal{L}^{outer}(\theta_{t+1}) - \mathcal{L}^{outer}(\theta_t) \quad (6) \\ & \leq \eta_{\theta} \rho^2 \left(-1 + \frac{L}{2}\right) - \left(\eta_{\alpha} - \frac{L}{2} \eta_{\alpha}^2\right) \|\nabla_{\alpha} \mathcal{L}^{outer}(\theta_t)\|_2^2 \end{aligned}$$

Summing up the above inequalities and rearranging the terms, we can obtain

$$\begin{aligned} & \sum_{t=1}^T \left(\eta_{\alpha} - \frac{L}{2} \eta_{\alpha}^2\right) \|\nabla_{\alpha} \mathcal{L}^{outer}(\theta_t)\|_2^2 \quad (7) \\ & \leq \mathcal{L}^{outer}(\theta_1) - \mathcal{L}^{outer}(\theta_{T+1}) + \eta_{\theta} \rho^2 \left(-T + \frac{LT}{2}\right) \\ & \leq \mathcal{L}^{outer}(\theta_1) + \eta_{\theta} \rho^2 \left(-T + \frac{LT}{2}\right) \end{aligned}$$

Further, we can deduce that,

$$\begin{aligned}
& \min_t \mathbb{E}[\|\nabla_{\alpha} \mathcal{L}^{outer}(\theta_t)\|_2^2] \\
& \leq \frac{1}{2 \sum_{t=1}^T (\eta_{\alpha} - L\eta_{\alpha}^2)} [2\mathcal{L}^{outer}(\theta_1) + \eta_{\theta} \rho^2 (-2T + LT)] \\
& \leq \frac{1}{\sum_{t=1}^T \eta_{\alpha}} [2\mathcal{L}^{outer}(\theta_1) + \eta_{\theta} \rho^2 (-2T + LT)] \\
& = \frac{2\mathcal{L}^{outer}(\theta_1)}{T} \frac{1}{\eta_{\alpha}} + \frac{\eta_{\theta} \rho^2 (-2 + L)}{\eta_{\alpha}} \\
& = \frac{2\mathcal{L}^{outer}(\theta_1)}{T} \max\{L, \frac{\sqrt{T}}{C}\} \\
& + \min\{1, \frac{k}{T}\} \max\{L, \frac{\sqrt{T}}{C}\} \rho^2 (-2 + L) \\
& \leq \frac{2\mathcal{L}^{outer}(\theta_1)}{C\sqrt{T}} + \frac{k\rho^2 (-2 + L)}{C\sqrt{T}} = O\left(\frac{1}{\sqrt{T}}\right)
\end{aligned} \tag{8}$$

□

## B. Proof of Theoretical Studies

We first introduce several useful definitions.

**Definition 4.** (Hoeffding's inequality). Let  $Z_1, \dots, Z_n$  be independent bounded random variables with  $Z_i \in [0, 1]$  for all  $i$ . Then

$$P\left(\frac{1}{n} \sum_{i=1}^n (Z_i - \mathbb{E}(Z_i)) \geq t\right) \leq \exp(-2n\epsilon^2)$$

and

$$P\left(\frac{1}{n} \sum_{i=1}^n (Z_i - \mathbb{E}(Z_i)) \leq -t\right) \leq \exp(-2n\epsilon^2)$$

for all  $t \geq 0$ .

**Definition 5.** ( $\epsilon$ -cover). A set  $\mathcal{A}$  is an  $\epsilon$ -cover of  $\mathcal{B}$ , if  $\forall \alpha \in \mathcal{B}, \exists \alpha' \in \mathcal{A}$  satisfies  $\|\alpha - \alpha'\| \leq \epsilon$ .

Then we prove the main results to show the safeness results of our proposal.

**Theorem 3.** (Safeness.) Let  $\theta^{SL}$  be the supervised model, i.e.,  $\theta^{SL} = \arg \min_{\theta \in \Theta} \sum_{i=1}^n \ell(h(\mathbf{x}_i; \theta), \mathbf{y}_i)$ . Define the empirical risk as:

$$\hat{R}(\theta) = \frac{1}{n} \sum_{i=1}^n [\ell(h(\mathbf{x}_i; \theta), \mathbf{y}_i)]$$

Then we have the empirical risk of  $\hat{\theta}$  that returned by DS<sup>4</sup>L is never worse than  $\theta^{SL}$  that learned from merely labeled data, i.e.,  $\hat{R}(\hat{\theta}) \leq \hat{R}(\theta^{SL})$ .

*Proof.* Suppose  $\hat{R}(\hat{\theta}) > \hat{R}(\theta^{SL})$ , obviously we can always set all weights of unlabeled examples to zero and obtain  $\hat{R}(\hat{\theta}) = \hat{R}(\theta^{SL})$ . Therefore,  $\hat{\theta}$  is never worse than  $\theta^{SL}$ . □

**Theorem 4.** (Generalization.) Assume the loss function is  $\lambda$ -Lipschitz continuous w.r.t.  $\alpha$ . Let  $\alpha \in \mathbb{B}^d$  be the parameter of example weighting function  $w$  in a  $d$ -dimensional unit ball. Let  $n$  be the labeled data size. Define the generalization risk as:

$$R(\theta) = \mathbb{E}_{(X,Y)}[\ell(h(X; \theta), Y)]$$

Let  $\alpha^* = \arg \min_{\alpha \in \mathbb{B}^d} R(\hat{\theta}(\alpha))$  be the optimal parameter in the unit ball, and  $\hat{\alpha} = \arg \min_{\alpha \in \mathcal{A}} \hat{R}(\hat{\theta}(\alpha))$  be the empirically optimal among a candidate set  $\mathcal{A}$ . With probability at least  $1 - \delta$  we have,

$$R(\hat{\theta}(\alpha^*)) \leq R(\hat{\theta}(\hat{\alpha})) + \frac{(3\lambda + \sqrt{4d \ln(n) + 8 \ln(2/\delta)})}{\sqrt{n}}$$

*Proof.* Let  $\epsilon = \frac{3}{\sqrt{n}}$  and  $\Delta = \frac{\sqrt{2d \ln(3/\epsilon) + 2 \ln(2/\delta)}}{\sqrt{n}}$ . For any fixed  $\alpha$ , according to Hoeffding's inequality, we have,

$$\begin{aligned}
P\{|\hat{R}(\hat{\theta}(\alpha)) - R(\hat{\theta}(\alpha))| > \Delta\} & \leq 2 \exp\left(-\frac{N\Delta^2}{2}\right) \tag{9} \\
& = \frac{\delta}{(3/\epsilon)^d}
\end{aligned}$$

Let  $\mathcal{A}$  be an  $\epsilon$ -cover of  $\mathbb{B}^d$ , then we have

$$|\mathcal{A}| \leq (1 + 2/\epsilon)^d \leq (3/\epsilon)^d.$$

Then, using union bound over all elements of  $\mathcal{A}$ , with probability no less than  $1 - \delta$  we have

$$\forall \alpha \in \mathcal{A} : |\hat{R}(\hat{\theta}(\alpha)) - R(\hat{\theta}(\alpha))| \leq \sqrt{\frac{2d \ln(3/\epsilon) + 2 \ln(2/\delta)}{n}} \tag{10}$$

Then,  $\forall \alpha' \in \mathcal{A}$ , we can obtain

$$\begin{aligned}
R(\hat{\theta}(\hat{\alpha})) & \geq \hat{R}(\hat{\theta}(\hat{\alpha})) - \sqrt{\frac{2d \ln(3/\epsilon) + 2 \ln(2/\delta)}{n}} \tag{11} \\
& \geq \hat{R}(\hat{\theta}(\alpha')) - \sqrt{\frac{2d \ln(3/\epsilon) + 2 \ln(2/\delta)}{n}} \tag{12} \\
& \geq R(\hat{\theta}(\alpha')) - 2\sqrt{\frac{2d \ln(3/\epsilon) + 2 \ln(2/\delta)}{n}} \tag{13}
\end{aligned}$$

The first and third inequality holds since Eq.(10) and the second inequality holds since  $\hat{\alpha} = \arg \min_{\alpha \in \mathcal{A}} \hat{R}(\hat{\theta}(\alpha))$ .

According to the Lipschitz-continuity of  $\ell$  w.r.t. to  $\alpha$ ,  $\forall \alpha \in \mathbb{B}^d$ , we have

$$\begin{aligned}
R(\hat{\theta}(\alpha)) & \leq R(\hat{\theta}(\hat{\alpha})) + \lambda\epsilon + 2\sqrt{\frac{2d \ln(3/\epsilon) + \ln(2/\delta)}{n}} \\
& \leq R(\hat{\theta}(\hat{\alpha})) + \frac{(3\lambda + \sqrt{4d \ln(n) + 8 \ln(2/\delta)})}{\sqrt{n}}
\end{aligned}$$

□
